# Supplementary material for: Influence of praseodymium content and postdeposition annealing on the structural and sensing characteristics of PrTixOysensing films using the sol–gel spin-coating method
Source: Royal Society of Chemistry journal article supplement (doi:10.1039/c6tc02863b), 2016-01-01
Supplement: c6tc02863b1.pdf [file c6tc02863b1.pdf]

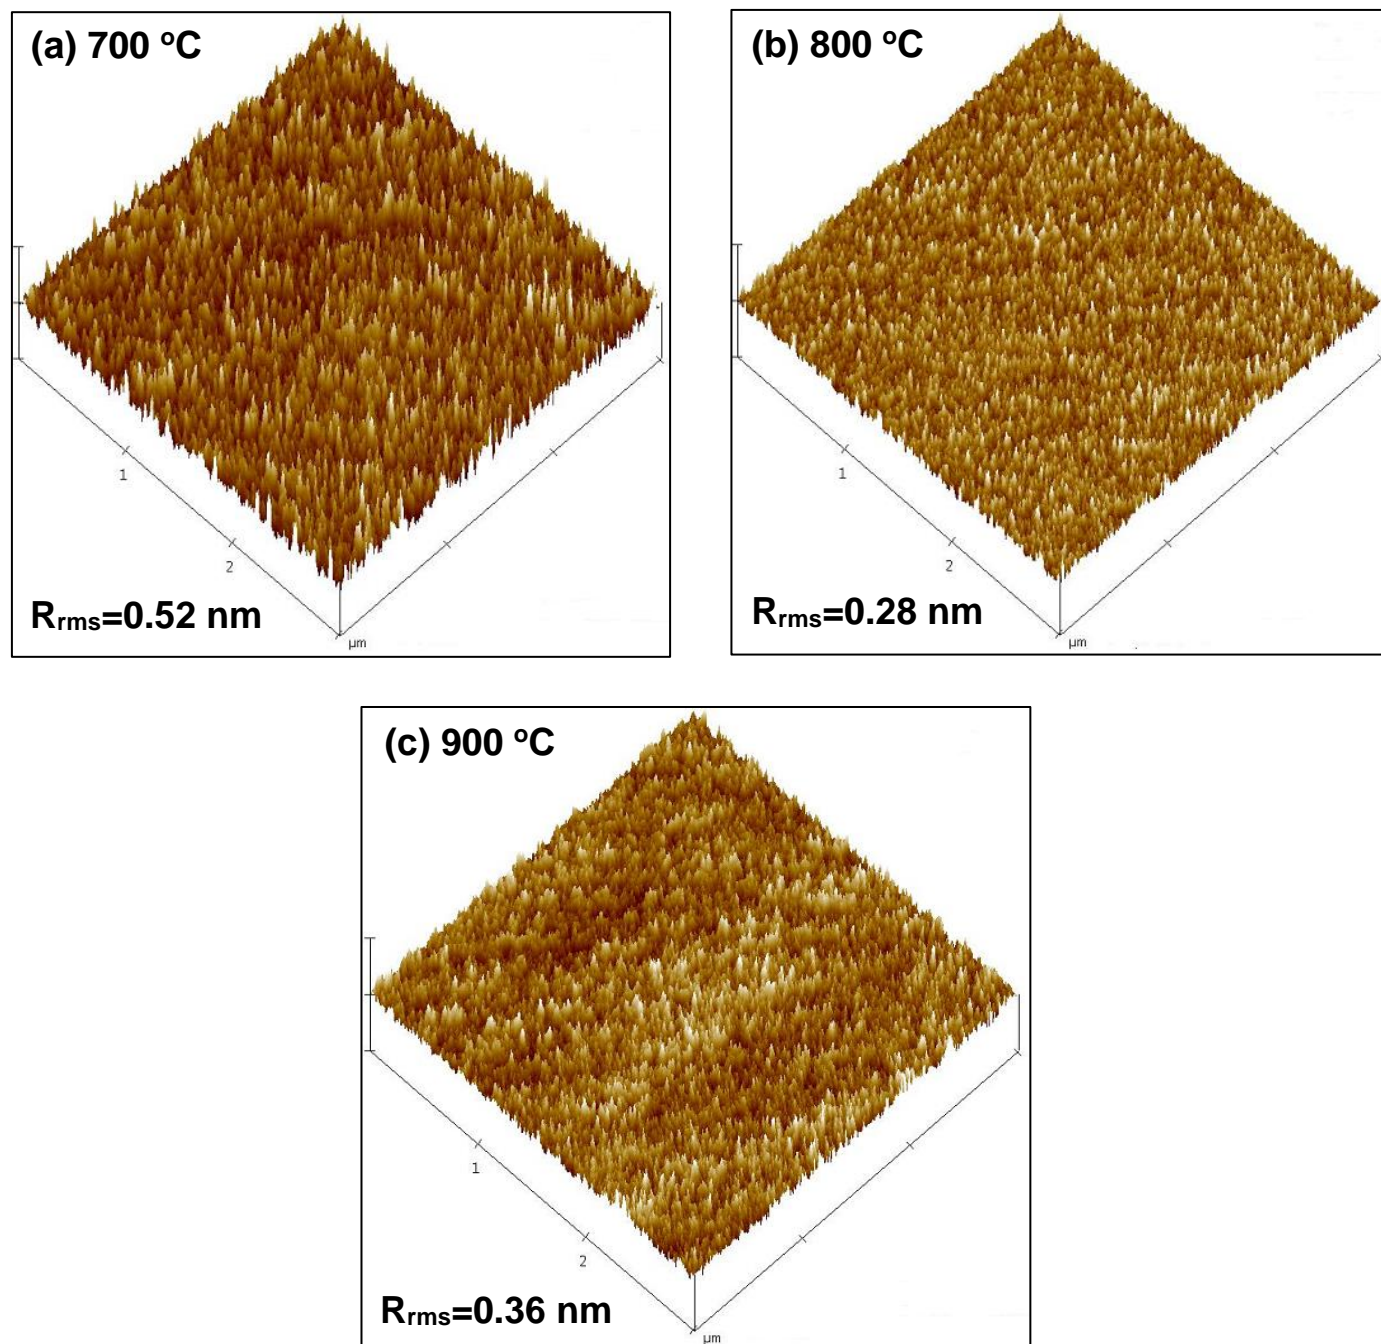

Fig. 1. AFM images of the  $\text{PrTi}_x\text{O}_y$  films prepared under 0.1 M Pr concentration with subsequent annealing at various temperatures.

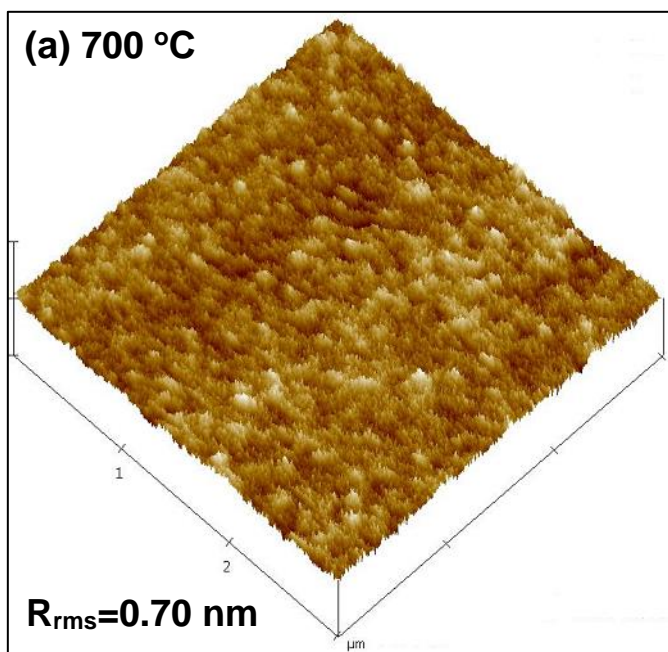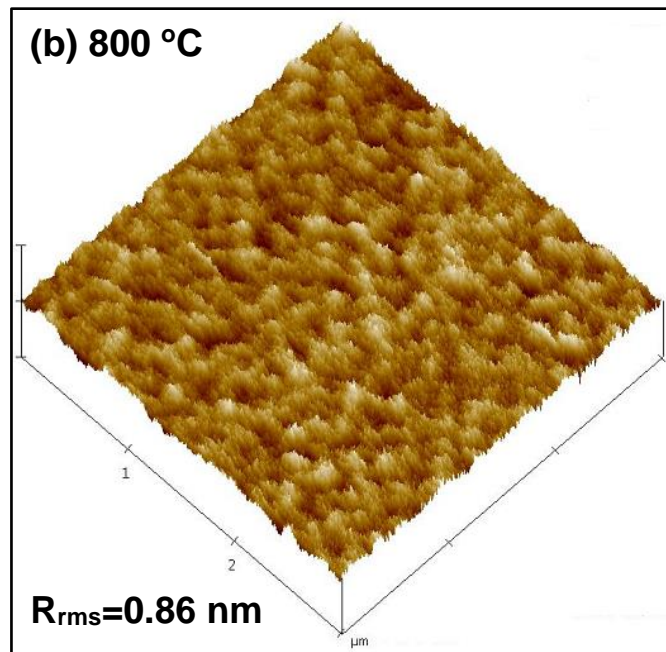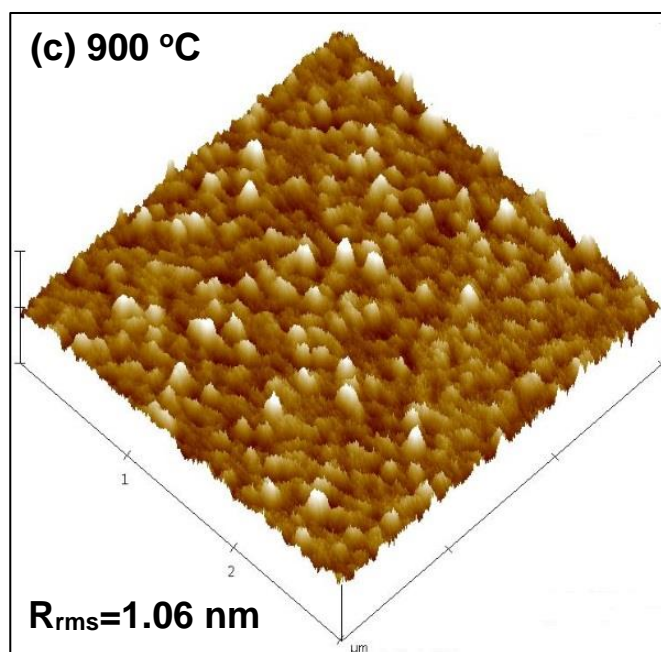

Fig. 2. AFM images of the  $\text{PrTi}_x\text{O}_y$  films prepared under 0.2 M Pr concentration with subsequent annealing at various temperatures.

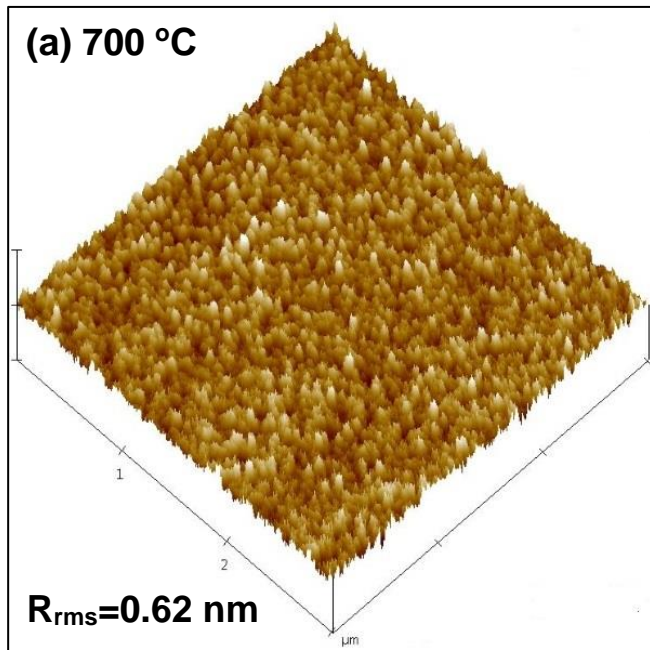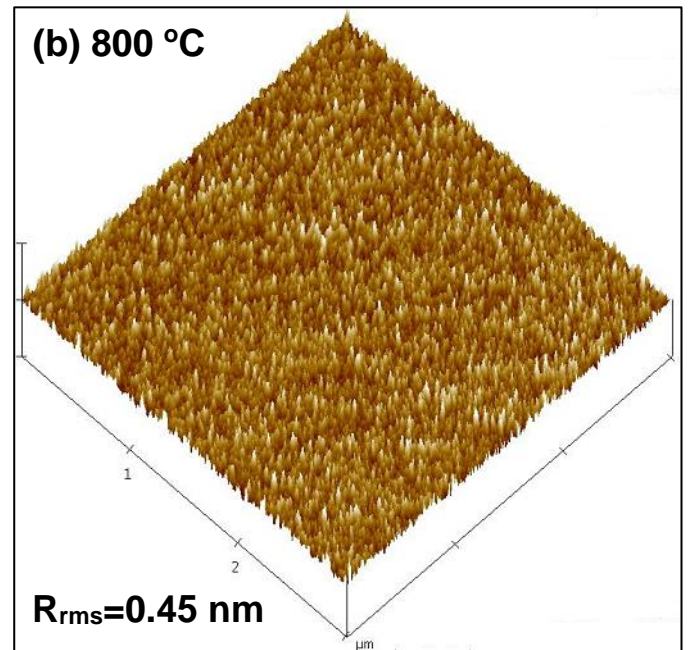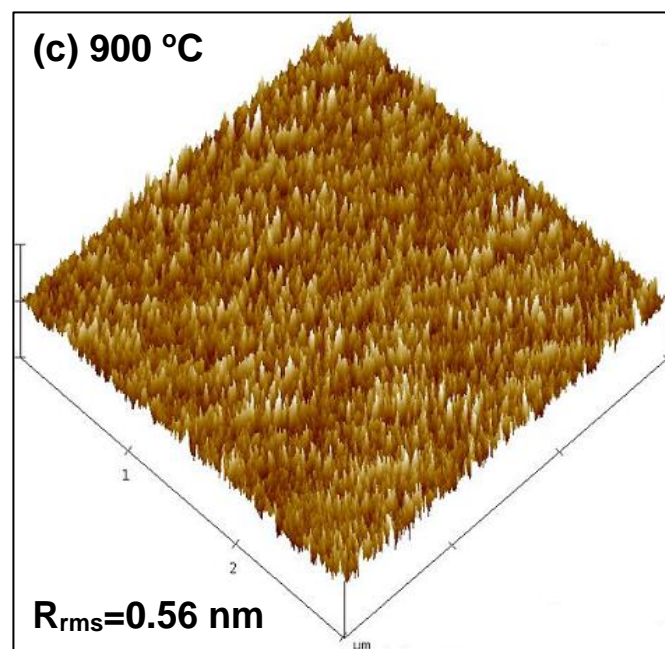

Fig. 3. AFM images of the  $\text{PrTi}_x\text{O}_y$  films prepared under 0.3 M Pr concentration with subsequent annealing at various temperatures.
